# 1           **History information emerges in the cortex during learning**

2           Odeya Marmor<sup>1</sup>, Fritjof Helmchen<sup>2,3</sup> and Ariel Gilad<sup>1</sup>

3

4           1. Department of Medical Neurobiology, Faculty of Medicine, The Institute for Medical  
5           Research Israel-Canada (IMRIC), The Hebrew University of Jerusalem, Jerusalem, Israel

6           2. Brain Research Institute, University of Zurich, CH-8057 Zurich, Switzerland.

7           3. Neuroscience Center Zurich, CH-8057 Zurich, Switzerland.

8           **Keywords:** wide-field imaging. Learning. History. Barrel cortex. Posterior parietal  
9           cortex. Texture discrimination. Cortex-wide dynamics.

10          **Corresponding author:** [odaya.marmor@mail.huji.ac.il](mailto:odaya.marmor@mail.huji.ac.il), [ariel.gilad@mail.huji.ac.il](mailto:ariel.gilad@mail.huji.ac.il).

11

12           **Abstract:**

13           We learn from our experience but the underlying neuronal mechanisms incorporating  
14           past information to facilitate learning is relatively unknown. Specifically, which cortical  
15           areas encode history-related information and how is this information modulated  
16           across learning? To study the relationship between history and learning, we  
17           continuously imaged cortex-wide calcium dynamics as mice learn to use their whiskers  
18           to discriminate between two different textures. We mainly focused on comparing the  
19           same trial type with different history information, i.e., a different preceding trial. We  
20           found history information in barrel cortex (BC) during stimulus presentation.  
21           Importantly, history information in BC emerged only as the mouse learned the task.  
22           Next, we also found learning-dependent history information in rostralateral (RL)  
23           association cortex that emerges before stimulus presentation, preceding activity in BC.  
24           History information was also found in other cortical areas and was not related to  
25           differences in body movements. Interestingly, a binary classifier could discriminate  
26           history information at the single trial level just as well as current information both in  
27           BC and RL. These findings suggest that past experience emerges in the cortex around  
28           the time of learning, starting from higher-order association area RL and propagating  
29           down (i.e., top-down projection) to lower-order BC where it can be integrated with  
30           incoming sensory information. This integration between the past and present may  
31           facilitate learning.

32

33           **Introduction:**

34           Learning is a process of acquiring new knowledge required for appropriate behavior  
35           and is highly dependent on our previous experience. Our brain integrates incoming  
36           sensory information with history information of previous stimuli to form a  
37           knowledgeable association of the current stimulus. Despite the strong link between  
38           history and learning, the underlying cortex-wide dynamics are relatively unknown,  
39           partially because most previous studies separately focus either on learning or  
40           history(Hattori et al., 2019). Learning-related neuronal dynamics are broadly observed  
41           across the whole cortex, including primary sensory or motor areas(Blake et al., 2002;  
42           Chen et al., 2015; Gilad and Helmchen, 2020; Jurjut et al., 2017; Komiyama et al., 2010;  
43           Li et al., 2008; Poort et al., 2015; Wiest et al., 2010; Xu et al., 2014; Yan et al., 2014),  
44           higher-order association areas(Driscoll et al., 2017b; Gilad and Helmchen, 2020) and  
45           prefrontal cortex(le Merre et al., 2018; Pasupathy and Miller, 2005). But do these areas  
46           that participate in the learning process also carry history information?

47                       Encoding of history information has been reported mainly in higher order  
48           cortical areas such as the posterior parietal cortex (PPC)(Akrami et al., 2018; Harvey et  
49           al., 2012; Hwang et al., 2017; Morcos and Harvey, 2016; Benjamin B Scott et al., 2017;  
50           Suzuki et al., 2022) , retrosplenial cortex(Hattori et al., 2019; Vann et al., 2009) and  
51           prefrontal cortex (Banerjee et al., 2020; Johnson et al., 2016; Kawai et al., 2015;  
52           Benjamin B. Scott et al., 2017; Sul et al., 2010; Tsutsui et al., 2016) , but also to a smaller  
53           extent in lower-order primary sensory areas such as BC(Banerjee et al., 2020; Chéreau  
54           et al., 2020; Rodgers et al., 2021). There is still a debate on which areas link history  
55           information with the learning process. Another important aspect of the history-  
56           learning relationship is the temporal aspect that enables integration of past  
57           information with present sensory information. For example, does history information  
58           emerge in cortex before present information arrives or do both past and present  
59           information maybe emerge simultaneously in a certain cortical area? From the  
60           temporal aspect, optogenetic silencing of PPC area during the inter-trial interval  
61           affected performance, highlighting that higher-order cortical areas may maintain  
62           history information before the incoming current stimulus(Akrami et al., 2018; Hwang  
63           et al., 2017).

64                       To study the history-learning relationship, we use wide-field cortical imaging  
65           of mice learning to discriminate between two textures and focus on the cortex-wide

66 dynamics of history information. In a previous study using the same dataset, we  
67 showed that in mice learning a whisker-based texture discrimination task, the activity  
68 in task-related areas (e.g., barrel cortex – BC and rostromedial association cortex – RL)  
69 increases as they become experts (Gilad and Helmchen, 2020). RL is part of the PPC and  
70 is located within the cluster of higher-order association areas surrounding V1. RL plays  
71 pivotal roles in cross-modal sensory integration, learning and history, but the  
72 relationship between history and learning in RL is unknown (Akrami et al., 2018;  
73 Driscoll et al., 2017a; Hattori et al., 2019; Hwang et al., 2017; Khodagholy et al., n.d.;  
74 Marcos and Harvey, 2016; Save and Poucet, 2009). Here, by classifying trials according  
75 to the preceding trial, we now demonstrate the emergence of history information as  
76 the mouse gains expertise. Specifically, history information emerges in RL, just before  
77 the stimulus presentation during the trials, and then is transferred to BC during the  
78 texture touch period, which may aid in learning the rewarded stimulus.

79           **Results:**

80           In this study we investigate history-dependent dynamics across the whole dorsal  
81           cortex and its emergence during learning in transgenic mice expressing a calcium  
82           indicator (GCaMP6f) in L2/3 excitatory neurons (n=7 mice). This dataset is identical to  
83           the one published in Gilad and Helmchen (Gilad and Helmchen, 2020) where we  
84           focused only on learning dynamics. Using wide-field calcium imaging through the intact  
85           skull (Gallero-Salas et al., 2021; Gilad et al., 2018b; Gilad and Helmchen, 2020; Vanni  
86           and Murphy, 2014), we chronically measured large-scale neocortical L2/3 activity in  
87           the contralateral hemisphere as mice learned a go/no-go whisker-dependent texture  
88           discrimination task (Gilad and Helmchen, 2020). Whisker movements and body  
89           movements were video monitored and synchronized to the calcium imaging data  
90           (Methods). To delineate areas in the dorsal cortex, we functionally mapped sensory  
91           areas for each mouse during anesthesia (see Methods). Based on these maps (and skull  
92           coordinates) we registered all images to the 2D top-view Allen reference atlas (Oh et  
93           al., 2014) and defined 25 areas of interest, further divided into four groups (Fig.  
94           1c; (Gilad and Helmchen, 2020) ).

95                       Mice were trained on a head-fixed, whisker-based go/no-go texture  
96           discrimination task (Chen et al., 2013; Gilad and Helmchen, 2020) (Fig. 1a; Methods).  
97           Each trial started with an auditory cue (stimulus cue), signaling the approach of either  
98           two types of sandpapers (grit size P100: rough texture; P1200: smooth texture; 3M) to  
99           the mouse's whiskers as 'go' or 'no-go' textures. The texture stayed in touch with the  
100           whiskers for 2 s, and then it was moved out after which an additional auditory cue  
101           (response cue) signaled the start of a 2-s response period (Fig. 1b) followed by a 6-s  
102           break until the next trial auditory cue. Five mice were trained to lick for the P100 and  
103           two mice were trained to lick for the P1200 texture. Mice were rewarded in 'Hit' trials  
104           for correctly licking after the go texture and punished with white noise for incorrectly  
105           licking for the no-go texture ('false alarm' trials, FA). Mice were neither rewarded nor  
106           punished when they withheld licking for the go and no-go textures ('Miss' and 'correct-  
107           rejection', CR, trials, respectively). We defined two time windows within the trial  
108           structure: the 'pre-period' when the texture approaches the whiskers (-1 to -0.6 s  
109           relative to the texture stop; mainly before the first whisker-texture touch); and the  
110           'stim-period' during texture touch (-0.2 to 0.2 s relative to texture stop; Fig. 1b).

111

112           The performance of all mice increased with training (5–11 days; ~500  
113 trials/day) and eventually reached high discrimination levels (quantified by  $d'$ ;  $d'$ ;  
114 Fig. s1; refs. (Gilad et al., 2018a); Methods). We defined the ‘learning threshold’ of  
115 reaching expert level for each mouse by crossing the inflection point of the sigmoid fit  
116 for the learning curve (in units of ‘trial number’; Fig. 1e, Fig. s1). The fastest learning  
117 mouse reached threshold in slightly less than thousand trials whereas mouse #4 took  
118 substantially longer (Fig. s1). In addition, we defined a naïve (1<sup>st</sup> day of recording),  
119 learning (day of crossing the learning threshold; 2<sup>nd</sup> or 3<sup>rd</sup> day) and expert (last  
120 recording day) phases for each mouse. All mice, after gaining expertise, showed strong  
121 activation in the Barrel cortex (Fig 1. d, upper panel). This activation was during  
122 stimulus representation, stronger in Hit trials compared to CR trials (Fig. 1d, lower  
123 panel), not dependent on the texture type (i.e. if the hit was p100 or p1200).

124           Here, we focus on the history content for each trial type. We sub-grouped all  
125 the Hit trials (i.e., the current trial type) based on the previous trial type: CR ("CR-Hit";  
126  $n=423\pm74$ , mean $\pm$ SEM), Hit ("Hit-Hit";  $n=585\pm42$ ), FA ("FA-Hit";  $n=217\pm24$ ) or Miss  
127 ("Miss-Hit";  $n=55\pm24$ ; Fig.1f, g). "Miss-Hit" were not analyzed due to a small number  
128 of trials. Our main analysis will compare "CR-Hit" (orange) and "Hit-Hit" (blue) trial  
129 pairs, since they are present in large numbers during all phases in each mouse  
130 separately (Fig. 1g; But see Fig. s3 for a comparison of other trial pairs). We emphasize  
131 that in this comparison, the current trial type is identical (i.e., Hit) whereas only the  
132 pervious trial (i.e., the history, CR or Hit) differed, therefore eliminating activity  
133 differences due to the current stimulus.

134

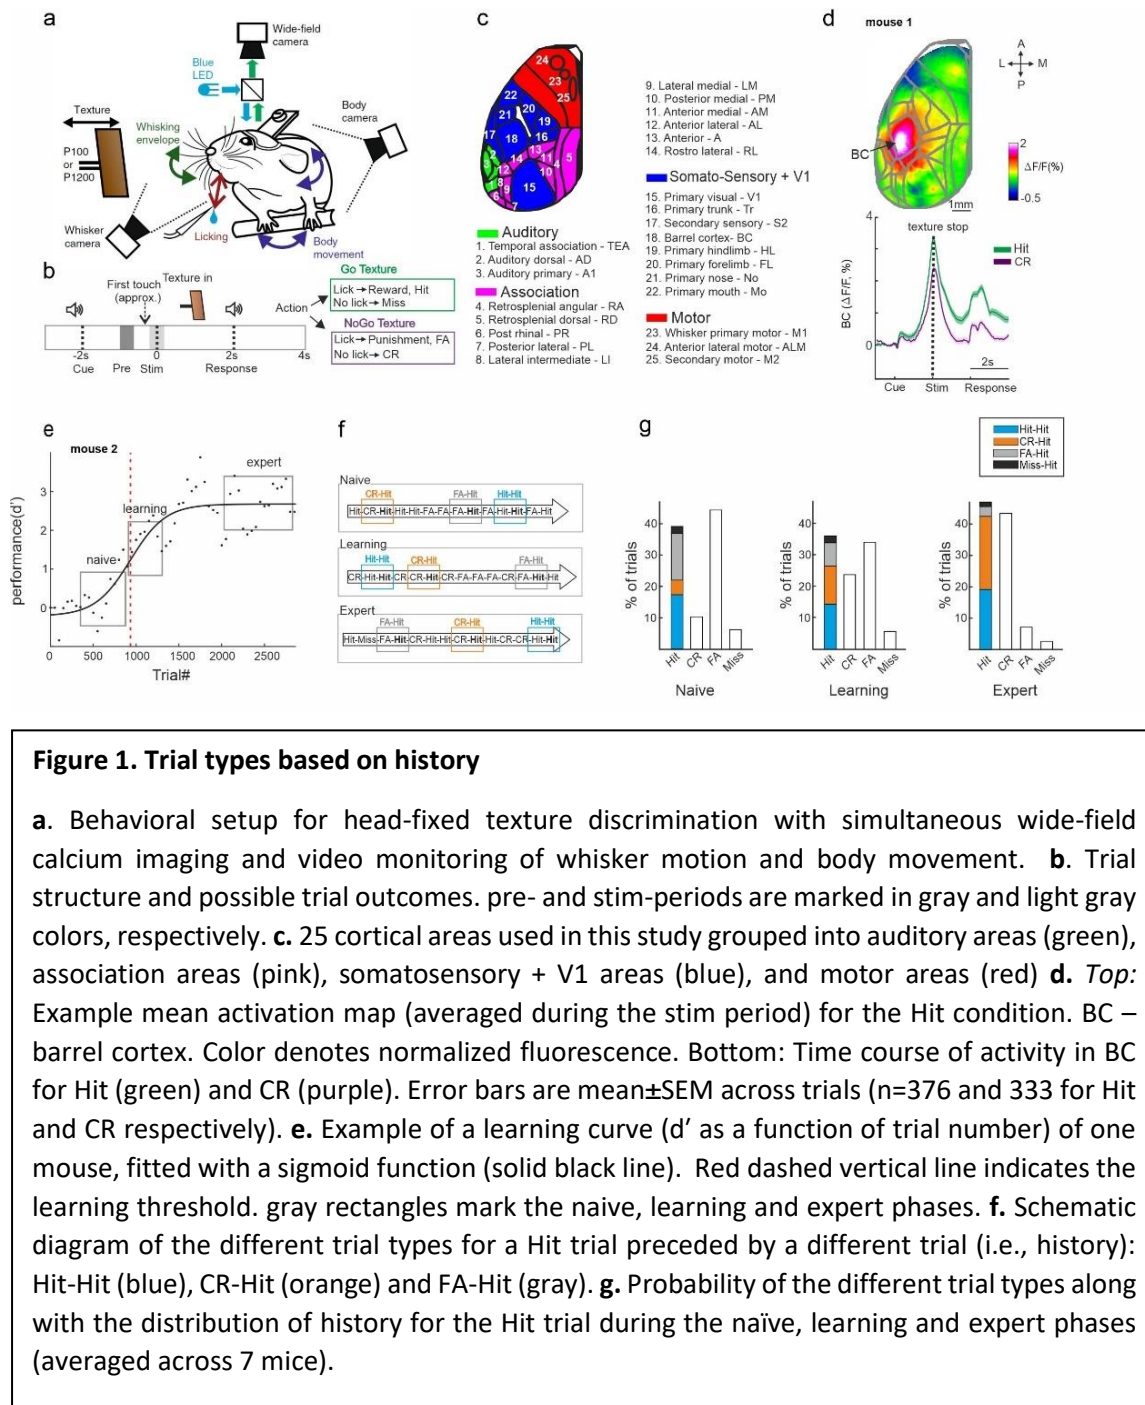

135

136

### History information in BC emerges during learning

137

First, we focused on history-dependent information in BC, specifically during the stim-

138

period. BC displayed higher activity during CR-Hit compared to Hit-Hit only during

139

learning and expert phases, but not during the naïve period (Fig. 2a, Fig. s2). This

140

difference was significant during the stim-period in learning and expert phases across

141 mice (Fig. 2b; signed rank test,  $p < 0.05$ ). To check whether this effect is not due to  
142 difference in body or whisker movements between the two pair types, we analyzed  
143 body movements by calculating (1 - frame-to-frame correlation) in mouth, forelimb  
144 and hindlimb areas and computed whisker envelope as a function of time (see  
145 Methods). Both body movements and whisker envelope were similar between CR-Hit  
146 and Hit-Hit pairs (Fig. 2c) and there was no significant difference across mice during  
147 the stim-period for neither naïve, learning or expert phases (Fig. 2d  $p > 0.05$ ; Signed rank  
148 test) nor during the pre-period ( $p > 0.05$ , signed rank test, data not shown). This result,  
149 along with the fact that the current trial type in both conditions is identical, strongly  
150 indicates the presence of history information in BC.  
151



152

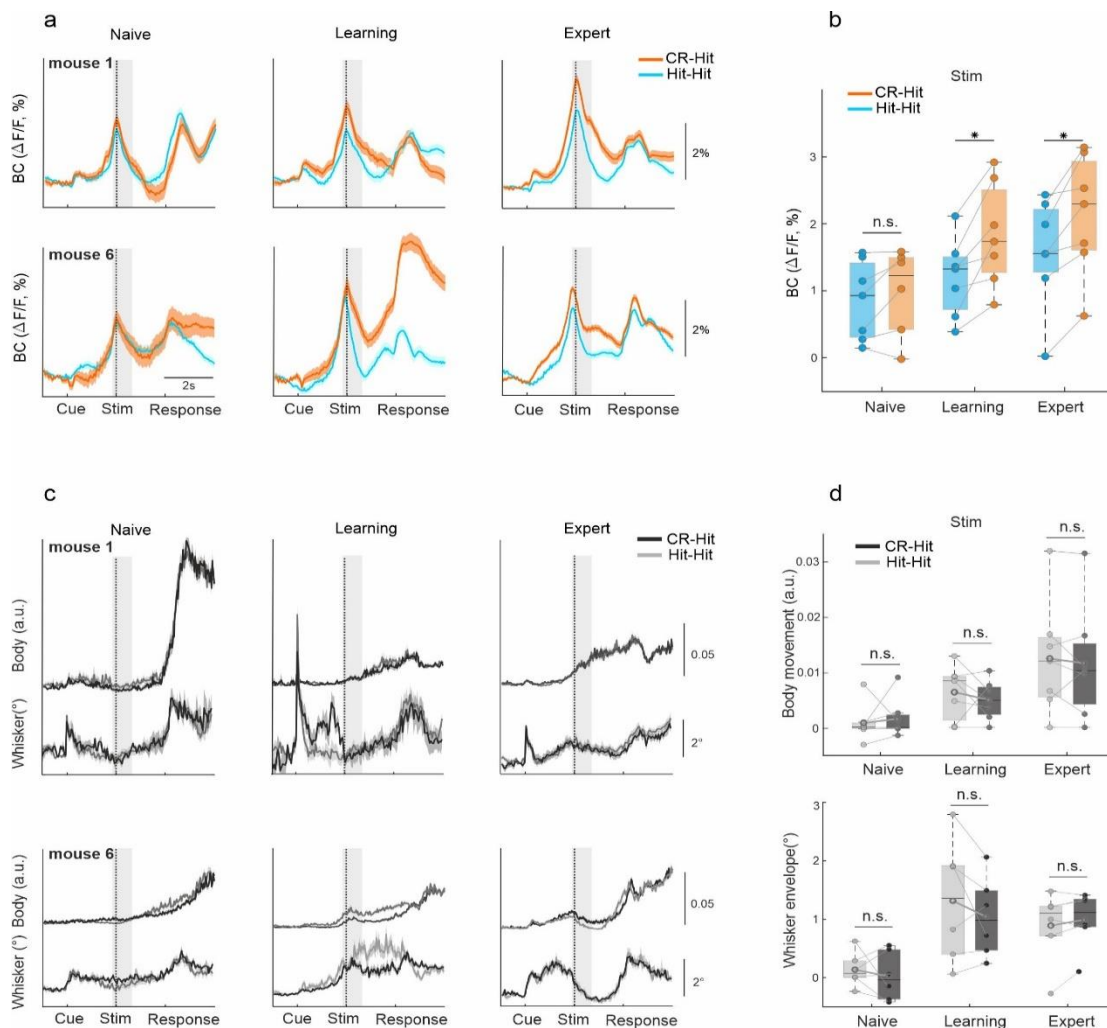

### Figure 2. History information in BC

**a.** Example of average BC response of Hit-Hit (blue) and CR-Hit (orange) from 2 mice (upper and lower row) in the naïve, learning and expert phases. Shaded bar depicts the stim period. Shaded areas are mean $\pm$ SEM across trials (mouse 1: n=86/66, 90/70 and 166/173 Hit-Hit/CR-Hit for naïve, learning and expert phases respectively. mouse 6: n=94/80, 86/121 and 99/135). **b.** Grand average of BC activity during the stim period (-0.2:0.6ms) for the naïve, learning and expert phases. Boxes indicate quartiles at 25/75<sup>th</sup> percentile across mice (n=7). **c.** Same as **a** but for body and whisker movements in the Hit-Hit (light gray) and CR-Hit (dark gray) trials. **d.** Same as **b** but for body (top) and whisker (bottom) movements. \*p < 0.05; n.s. not significant; Wilcoxon signed-rank test.

153

We next quantified the emergence of history information with regard to the different time scales, the trial structure (within seconds) or the learning profile (across days).

154

We first show 2D activity plots in BC for each trial pair (i.e., CR-Hit and Hit-Hit; showing activity of only the Hit trial), where trial time is plotted on the x-axis and trial number

156

across learning time on the y-axis (Fig. 3a; 100-trial bins regardless of trial pair). Both

157

158 trial pairs display an increase in activity during the stim-period shortly after passing the  
159 learning threshold. We defined a history modulation index as the difference in activity  
160 for BC between the two pair types (Hit-CR minus Hit-Hit). History modulation increased  
161 around the stim-period only in learning and expert phases but not in the naïve case  
162 (Fig 3b, c). A significant history modulation was defined as values exceeding  $\text{mean} \pm 2\text{SD}$   
163 of a trial-shuffled sample distribution ( $n=1000$  iterations) and was performed for each  
164 mouse separately (Fig. 3b). The onset of the history modulation was defined as the first  
165 time frame reaching significant values (red arrows in Fig. 3b) and was found in BC to  
166 be during the stim-period (Fig. 3d;  $0.05 \pm 0.32\text{s}$ ,  $-0.1 \pm 0.27\text{s}$  1s,  $\text{median} \pm \text{SEM}$  relative to  
167 texture stop in learning and expert phases respectively). We note that in the expert  
168 phase there is also a small peak exceeding the significance around the cue, indicating  
169 history information in BC may be present to some extent before stimulus presentation.  
170 Next, we quantified the history modulation in BC during the stim period as a function  
171 of the learning time course. History modulation in BC had the steepest increase after  
172 each mouse crossed its learning threshold (Fig. 3e, f). The onset of the history  
173 modulation was defined as the first trial bin exceeding the trial-shuffled sample  
174 distribution and was found to occur shortly after the learning threshold, highly  
175 correlated with the learning threshold indicating strong relationship between history  
176 emergence and learning of each individual mouse (Fig. 3g, h;  $500 \pm 83$  trials,  
177  $\text{median} \pm \text{SEM}$ ,  $r=0.97$   $p < 0.001$ , spearman correlation). Note that our onset  
178 measurement is relatively strict and an increase in history information can be observed  
179 shortly (i.e., tens of trials) after crossing the learning threshold (Fig. 3d).

180 We expanded our history analysis also for the pair types other than CR-Hit and Hit-Hit.  
181 For sufficient trial numbers, we focused on the learning phase. First, we compare FA-  
182 Hit to Hit-Hit and CR-Hit, i.e., the same current trial type but preceded by an error trial  
183 (FA). Response in BC for FA-Hit was similar to Hit-Hit and significantly lower compared  
184 to CR-Hit (Fig. s3;  $p < 0.05$  signed rank test). This result highlights that specifically a  
185 correct rejection (CR), rather than the stimulus (i.e., texture) type, has a strong history  
186 effect. Next, we compared FA-CR, Hit-CR and CR-CR, i.e., similar to the previous  
187 comparison differing only in the current trial type (CR instead of Hit). There was no  
188 significant difference between the different pairs, indicating that the current trial type,  
189 i.e., Hit in this case, has a strong effect along with the history of the CR (Fig. s3;  $p > 0.05$ ,  
190 signed rank test). A comparison of FA-FA, Hit-FA and CR-FA did not show a significant  
191 difference (Fig. s3;  $p > 0.05$ , signed rank test). In general, a preceding CR trial resulted in

192 higher activation independent of the current trial type (i.e., Hit, CR or FA; not significant  
193 for CR and FA), indicating that history information is present at the current time  
194 independently of incoming sensory information (Fig. s3; Compare orange bars to the  
195 blue bars). In conclusion, we found that the CR-Hit pair displayed a specific  
196 enhancement in BC that is related both to the preceding and current trial type (see  
197 discussion).

198

199 Next, we expanded our analysis to the whole dorsal cortex during the stim  
200 period. Mean activation maps for both CR-Hit and Hit-Hit pairs (i.e., Activity for the  
201 current Hit trial whereas only the preceding trial was different) during the stim period  
202 displayed a pronounced activation patch in BC during naïve, learning and expert phases  
203 (Fig. 4a). BC activity was higher in CR-Hit compared to Hit-Hit especially during learning  
204 and expert phases. The grand average activity for all 25 cortical areas highlights history-  
205 dependent information that emerges during learning (Fig. 4b). We note that other  
206 areas, e.g., different association areas, also encoded history-dependent information  
207 especially during learning and expert phases. Taken together, these results indicate  
208 that BC encodes history-dependent information that emerges during the stim period  
209 and just after learning. These results gave us the motivation to examine history-  
210 dependent information at time periods before texture touch.

211

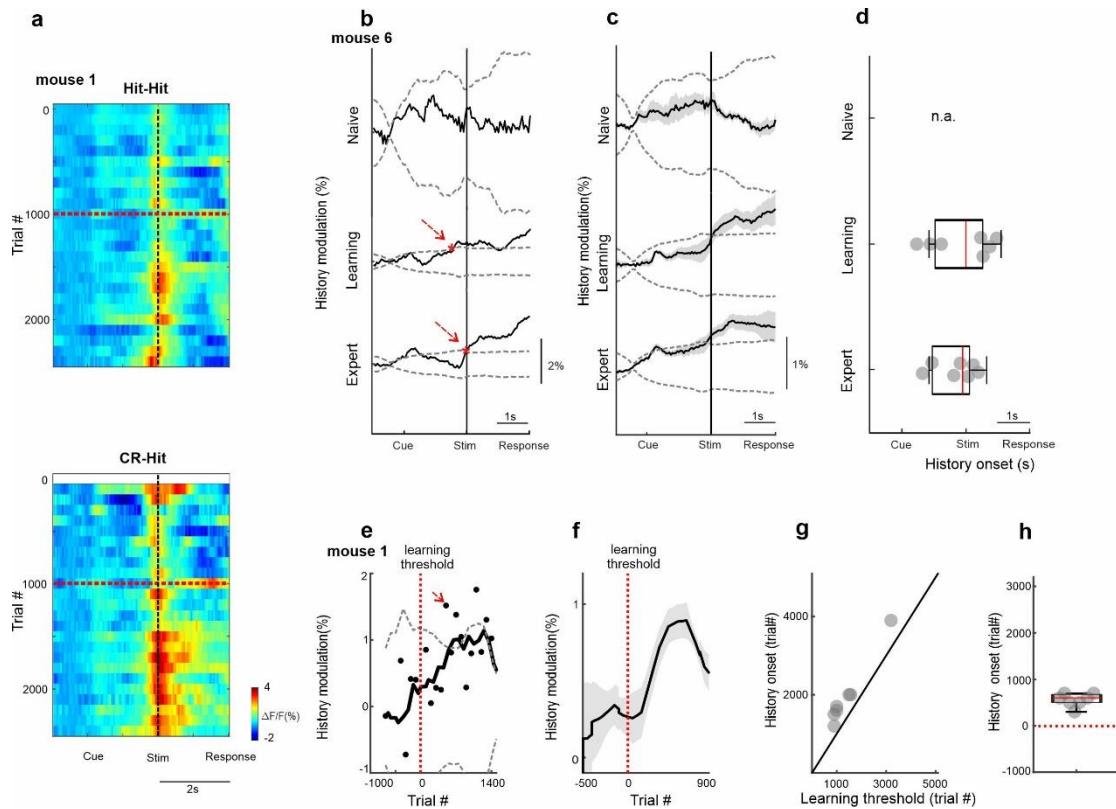

**Figure 3. Temporal dynamics of history information in BC**

**a.** 2D plot of BC responses for Hit-Hit (top) and CR-Hit (bottom; trial structure on x-axis; Trial number across learning (in bins of 100 trials) on the y-axis). Red horizontal dashed line indicates learning threshold. Black dashed vertical line indicates the time of texture stop. **b.** Example from one mouse of the history modulation (activity in CR-Hit minus activity in Hit-Hit) in BC along the trial structure in the naïve, learning and expert phases. Dashed gray line is the mean  $\pm 2$  SD of the trial-shuffled data ( $n=1000$  iterations). The first-time frame crossing the shuffle data is defined as the onset and is marked in red. **c.** Mean history modulation in BC along trial time. Shadows depict mean $\pm$ SEM across mice ( $n=7$ ). **d.** Median onset of history modulation. Boxes indicate quartiles at 25/75<sup>th</sup> percentile across mice ( $n=7$ ). **e.** Example from one mouse of the history modulation along learning dimension. Dashed gray line is the mean  $\pm 2$  SD of the trial-shuffled data ( $n=1000$  iterations). The first-time frame crossing the shuffle data is defined as the onset for learning and is marked in red. The vertical red dashed line (trial 0) marks the learning threshold. **f.** Mean history modulation in BC along the learning profile aligned to the learning threshold of each mouse (time 0). Shadows depict mean $\pm$ SEM across mice ( $n=7$ ). **g.** Onset of the history modulation for learning as a function of the learning threshold. Each point is one mouse ( $n=7$ ). **h.** Median onset of history modulation relative to the learning threshold. Boxes indicate quartiles at 25/75<sup>th</sup> percentile across mice ( $n=7$ ).

212

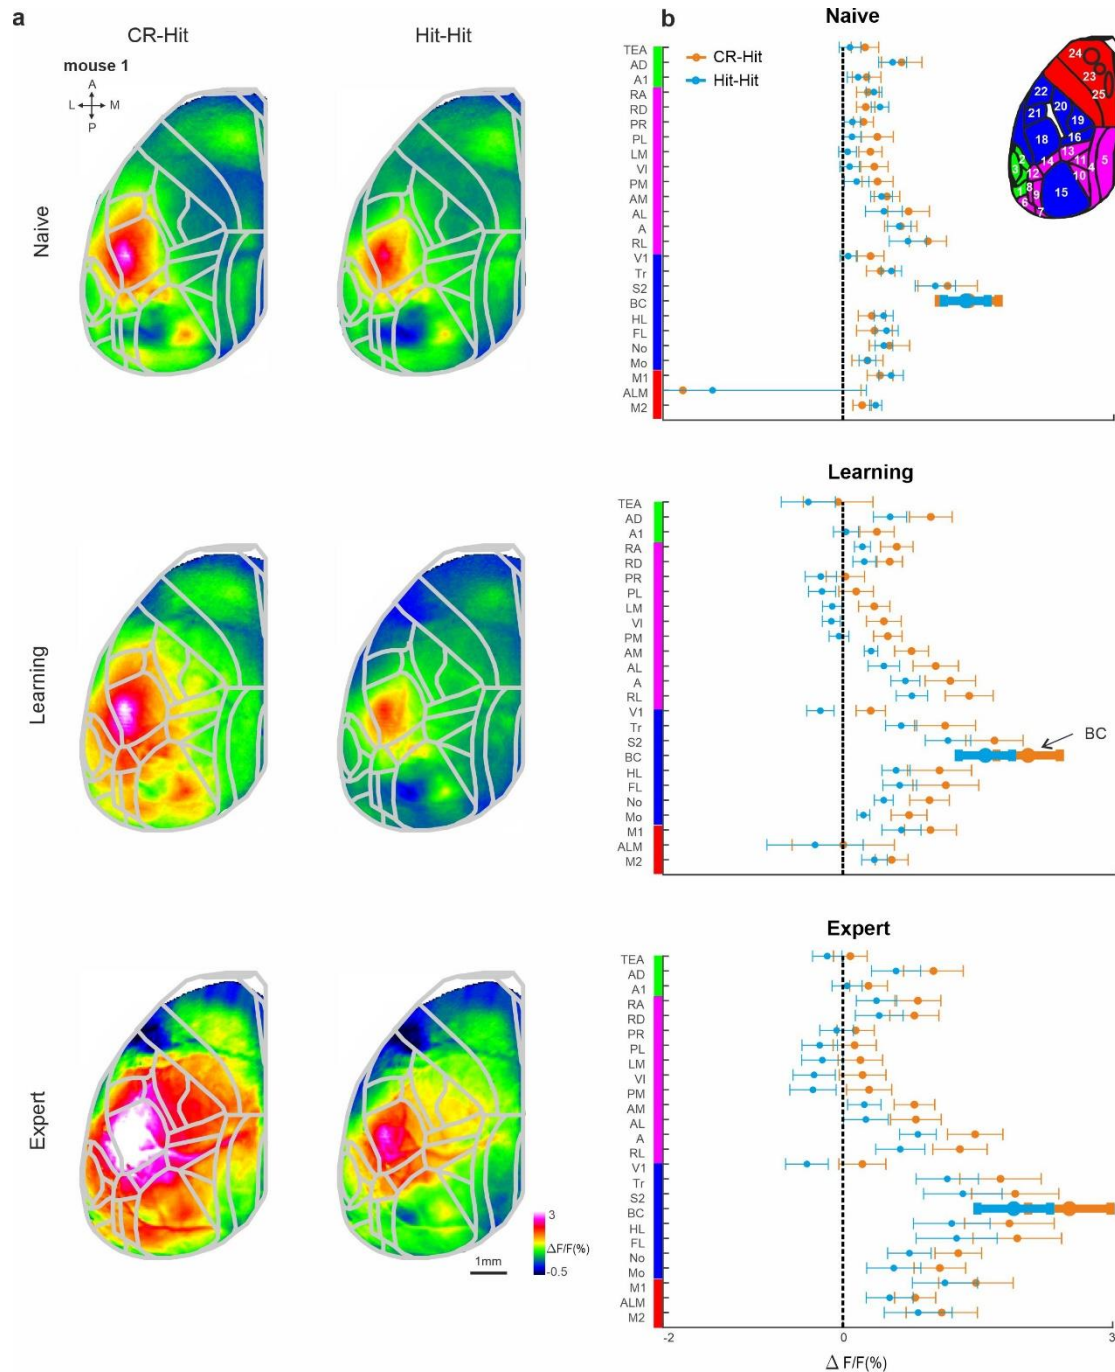

**Figure 4. Cortex-wide history modulation during the stim period.**

**a.** Mean activity maps averaged within the stim period (-0.2 – 0 seconds relative to texture stop) of CR-Hit (left) Hit-Hit (right) during the naïve (top), learning (middle), expert (bottom) phases. Color bar denotes normalized fluorescence ( $\Delta F/F$ ). 2D top-view atlas is superimposed in gray. **b.** Grand average neuronal activity during the stim period (-0.2:0.2s) for Hit-Hit (blue) and CR-Hit (orange) in all 25 areas for the naïve (top), learning (middle) and expert (bottom) phases. Error bars depict mean $\pm$ SEM across mice (n=7).

213

214 **History information in RL before sensation**

215 We next focused our analysis on the pre-period, just before texture touch (-1 to -0.6  
216 sec before texture stop). Mean activity maps during the pre-period highlight activity in  
217 association area rostrolateral (RL) that is present for both CR-Hit and Hit-Hit pairs  
218 during the naïve, learning and expert phases (Fig. 5a;(Gilad and Helmchen, 2020)) RL  
219 pre-period activity is higher in CR-Hit compared to Hit-Hit mostly during learning and  
220 expert phases. In addition, higher RL activity in CR-Hit pair starts even before the pre-  
221 period, indicating that history-information is not directly related on the current  
222 stimulus (Fig. 5b). The grand average of all 25 cortical areas, highlights the emergence  
223 of history-dependent information emerging during learning, especially in RL, but also  
224 in other association and sensory areas (Fig. 5c).

225 RL activity was significantly higher in CR-Hit compared to Hit-Hit trials in the  
226 pre- period during the expert phase (Fig. s4; signed rank test,  $p < 0.05$ , similar trend for  
227 the learning phase but insignificant; not significant for the naïve phase). The onset of  
228 history modulation within the trial structure (as in Fig. 3d) was earlier in RL compared  
229 to BC in both learning ( $-0.15 \pm 0.32s$  and  $0.05 \pm 0.32s$ , median $\pm$ SEM in RL and BC  
230 respectively) and expert phases ( $-0.75 \pm 0.2s$  and  $-0.1 \pm 0.27s$ , median $\pm$ SEM in RL and BC  
231 respectively) but not significantly different ( $p > 0.05$ , signed rank test). The onset for the  
232 history modulation with relation to the learning profile in RL (similar to Fig. 3h; During  
233 the pre-period) was also earlier than BC, but not significantly different ( $200 \pm 162$  trials  
234 after crossing threshold compared to  $500 \pm 83$  in BC; median $\pm$ SEM,  $p > 0.05$  signed rank  
235 test). Taken together, these results indicate that as mice gain expertise, RL encodes  
236 history information before the next stimulus occurs, which may inform through its  
237 projections to BC where history information then could be integrated with information  
238 of the current incoming texture.



239

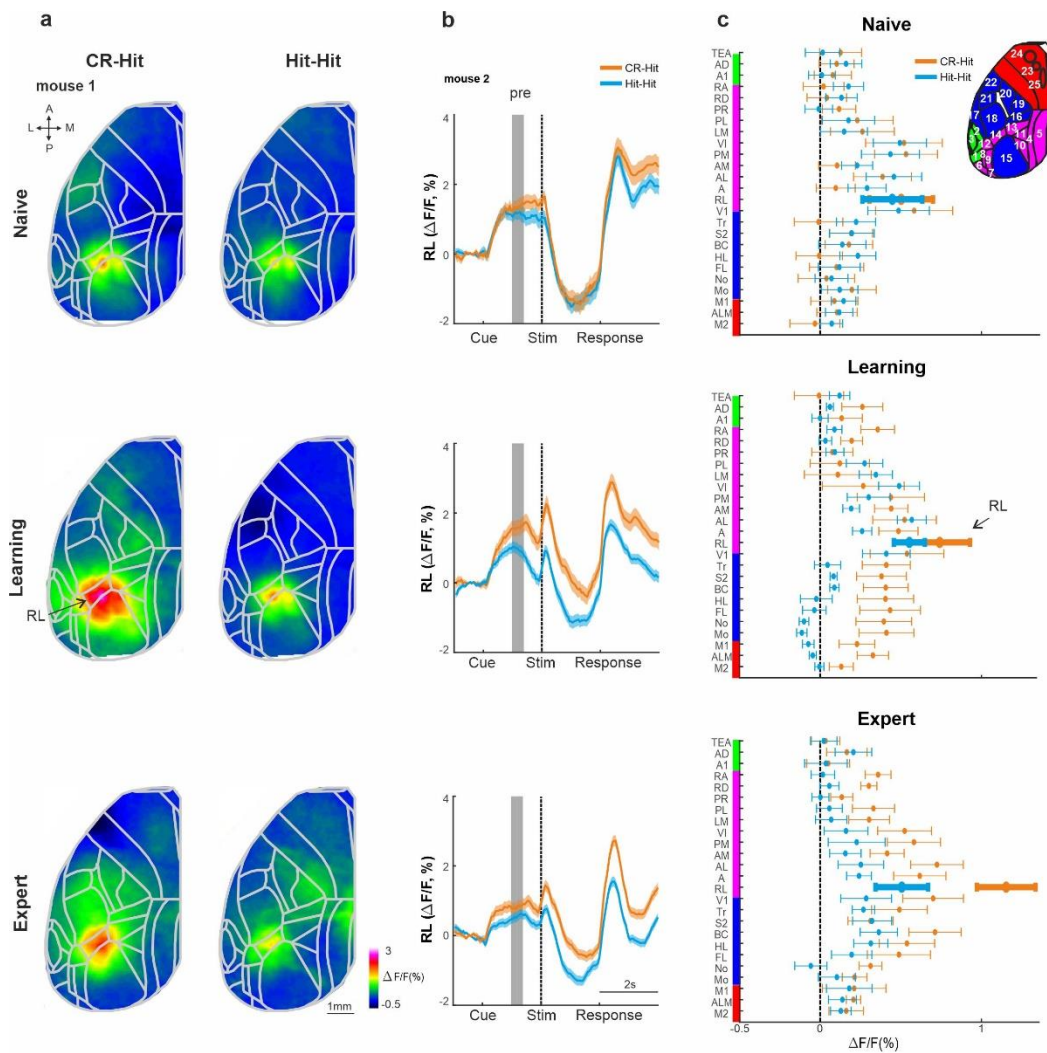

**Figure 5. History information in RL before stimulus presentation.**

**a.** Mean activity maps averaged within the pre-period (-1 – -0.8 seconds relative to texture stop) of CR-Hit (left) Hit-Hit (right) during the naïve (top), learning (middle), expert (bottom) phases. Color bar denotes normalized fluorescence ( $\Delta F/F$ ). 2D top-view atlas is superimposed in gray. **b.** Example from one mouse of average RL response of Hit-Hit (blue) and CR-Hit (orange) in the naïve (top), learning (middle) and expert (bottom) phases. Shaded gray bar depicts the pre-period (-1– -0.6). Shadows are mean  $\pm$  SEM across trials (n=51/54, 92/78 and 168/173 Hit-Hit/CR-Hit for naïve, learning and expert phases respectively) **c.** Grand average neuronal activity during the pre-period (-1 – -0.6) for Hit-Hit (blue) and CR-Hit (orange) in all 25 areas for the naïve (top), learning (middle) and expert (bottom) phases. Error bars depict mean  $\pm$  SEM across mice (n=7).

240

241

242

243

244 **Past versus present discrimination power in BC and RL**

245 How well can BC and RL activity discriminate at the single trial level history information  
 246 compared to the information of the current stimulus? To do this, we computed the  
 247 receiver operating characteristics (ROC) analysis between specific trial types (Gilad et  
 248 al., 2020, 2013) , along with the area under the curve (AUC) quantifying the  
 249 discrimination power at the single trial level (Methods). We calculated the AUC  
 250 between two types of trials (Fig. 6a): 1) Activity between CR-Hit and Hit-Hit pairs based  
 251 on the activity during the Hit trial. This is defined as ‘history-AUC’ since only the  
 252 previous trial is different. 2) Activity between the current Hit and CR trials. This is  
 253 defined as the ‘Current-AUC’ because the current trial types are different (both in  
 254 terms of stimulus type and action). Both history-AUC and current-AUC are calculated  
 255 for BC and RL for each time  
 256 frame along the trial structure  
 257 and for naïve, learning and  
 258 expert phases. Intuitively, one  
 259 would assume that the current-  
 260 AUC will display higher  
 261 discrimination power compared  
 262 to the history-AUC because the  
 263 latter AUC measure compares  
 264 the same current trial type  
 265 which should be harder to  
 266 discriminate. Interestingly,  
 267 during the expert phase, history-

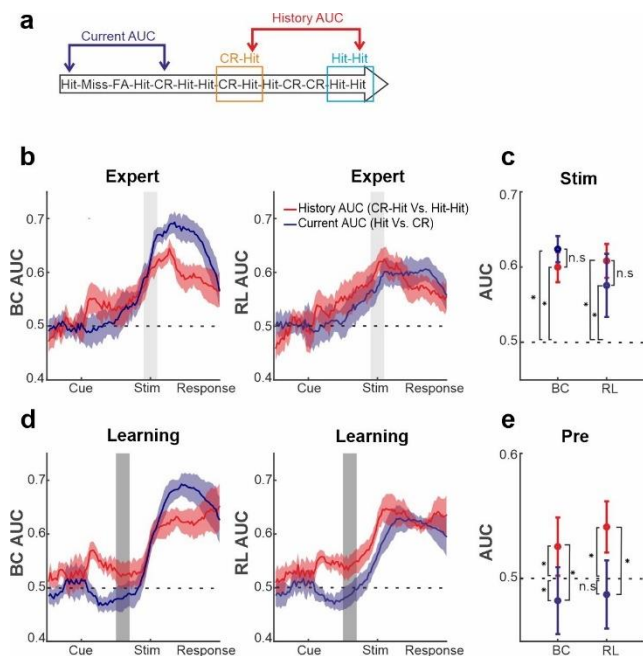

**Fig. 6. History and current information are equally discriminative at the single trial level**

**a.** Schematic diagram for the two types of area under the curve (AUC) measures (derived from a ROC analysis): history-AUC between the Hit responses for Hit-Hit and CR-Hit trial types. Current-AUC between Hit and CR trial types regardless of their history. **b.** Grand average of the history (red) and current (blue) AUC measures in BC (left) and RL (right) along the trial structure during the expert phase. Shadows depict mean±SEM across mice (n=7). Values significantly differ from chance (0.5) in history-AUC ( $p < 0.05$ , 2 tail ttest, for both BC and RL). **c.** Grand average of history and current-AUC measures during the stim period in the expert phase. Error bars indicate mean±SEM across mice (n=7). **d.** Same as in a but for the learning phase. Error bars as in a, values significantly differ from chance (0.5) for history-AUC ( $p < 0.05$ , 2 tail ttest, for both BC and RL), but not for the current-AUC in RL. **e.** same as in c, but for the pre-period during the learning phase. \* $p < 0.05$ ; n.s. not significant; Wilcoxon signed-rank test.



268 AUC in both BC and RL has a discrimination power in the stim period that is not  
269 significantly different than that of the current-AUC (Fig. 6b, c;  $p>0.05$ ; signed rank test).  
270 In other words, we found that BC and RL discriminate past stimuli just as well as the  
271 current stimuli. In addition, during the learning phase, RL and to some extent BC,  
272 display a significantly higher history-AUC compared to the current-AUC, specifically in  
273 the pre-period (Fig. 6d, e;  $p<0.05$ ; Signed rank test). This indicates that history  
274 information is discriminative at the single trial level before stimulus onset. Taken  
275 together, we find that BC and RL can encode the past just as well as the present.

276

## 277 **Discussion:**

### 278 **History information is trial-type specific**

279 We have identified cortex wide encoding of history information that emerges as mice  
280 learn to discriminate between two textures. History information was not dependent  
281 on the current stimulus and emerged in RL association area before texture touch. Our  
282 results indicate that a previous CR trial will lead to higher activity in BC and RL  
283 compared to a previous Hit trial. This difference is probably not due to pure sensory  
284 differences in the previous trial since the effect was not present after FA trials (sup Fig.  
285 s3, left panel). In addition, mice trained to lick the P1200 texture displayed a similar  
286 bias to the CR-Hit, further indicating that these differences are not purely sensory  
287 related. Moreover, this difference is probably not related to the previous motor action  
288 (e.g., either lick or no-lick). During the current trial, body and whisker movements were  
289 not significantly different, emphasizing that there are no motor-related differences  
290 based on the previous trial (Fig. 2c, d). The fact that these differences emerged only  
291 after learning implies that these differences are not purely sensory or motor related  
292 but rather reflect internal history-related information. It may be that in a go/no-go  
293 discrimination task the mouse mainly learns not to lick for the no-go texture (i.e., CR)  
294 making the information of a CR trials more pronounced relatively to a Hit trials.  
295 Another possibility is that a previous CR will cause a pronounced anticipatory state for  
296 the incoming texture, leading to enhanced cortical activity. Again, we did not find any  
297 consistent differences in motor movements based on the previous trials making this  
298 possibility less likely. In summary, our results indicate that history-dependent  
299 information emerges internally in cortex as mice learn to discriminate between two  
300 stimuli.

301 **History information emerges in RL and transferred to BC**

302 BC is considered a lower-order sensory area but encodes not only lower-order stimulus  
303 features(Chen et al., 2013; Estebanez et al., 2012; Garion et al., 2014; Safaai et al.,  
304 2013) but also higher-order information such as choice and reward value(Chéreau et  
305 al., 2020; Rodgers et al., 2021; Zuo and Diamond, 2019). We additionally found that BC  
306 carries history information during the sensation period which is related to the previous  
307 trial several seconds back. The presence of history information in lower-order areas  
308 such as BC is interesting by itself, but also raises the question of where is its origin.  
309 Interestingly, we show that history information emerges in RL before texture touch  
310 implying that RL may transfer history information in a top-down manner to BC for  
311 optimal sensory integration.

312 The presence of history information in RL before the sensation period implies  
313 that RL may play a crucial role in linking past experience to ongoing sensory integration.  
314 RL is the lateral part of PPC adjacent to BC, within the cluster of higher-order  
315 association areas surrounding V1 (Hovde et al., 2018; Lyamzin and Benucci, 2019).  
316 Previous studies showed that history information of choice-outcome is encoded by PPC  
317 neurons(Harvey et al., 2012; Hwang et al., 2017; Marcos and Harvey, 2016; Pho et al.,  
318 2018), as well as history of sensory information(Akrami et al., 2018). Silencing the PPC  
319 specifically during the inter-trial interval affected the behavioral performance of rats  
320 (Akrami et al., 2018; Hwang et al., 2017), whereas silencing during the stimulus  
321 presentation did not affected performance. The PPC is also reciprocally connected to  
322 hippocampus via entorhinal and retrosplenial cortices (Save and Poucet, 2009;  
323 Whitlock et al., 2008) and to basolateral amygdala via the anterior cingulate cortex  
324 (Suzuki et al., 2022), giving fast access to the different memory hubs. Khodagholy et  
325 al.(Khodagholy et al., 2017) showed coupling of PPC and hippocampal ripples that  
326 strengthen in non-REM sleep after rats learned a spatial exploration task, further  
327 indicating that RL may relay history information from subcortical memory hubs to  
328 cortex.

329 The fact that history information emerges only after learning, implies that it  
330 encodes a subjective value or association of a certain past stimulus. It may be that only  
331 once the value of a certain stimulus has been established, e.g., by strengthening  
332 indirect connections between basolateral amygdala (that has a role in associative  
333 memory) and RL, history information can aid in efficiently encoding the incoming  
334 stimulus. In light of this discussion, we suggest that the consolidation of a certain

335 association (in our case a CR), induces long-term synaptic plasticity of top-down  
336 projections from higher-order association area (e.g., RL) to a lower-order sensory area  
337 (e.g., BC). This projection-specific potentiation may better recruit sensory cortex in the  
338 context of the immediate previous history.

339

#### 340 **Mechanisms for integrating past and present**

341 The wide-field signal measured in our study reports bulk population activity specifically  
342 in L2/3 excitatory cells. Are neuronal populations encoding past and present  
343 information in the BC overlapping or distinct? On one side, it could be that the same  
344 cell in BC encodes both the current stimulus and additionally receives top-down input  
345 from RL carrying the past stimulus identity. This additional top down information may  
346 amplify sensory integration and optimize discrimination of the current stimulus. On the  
347 other side, previous studies that measured single cell activity in the BC showed that  
348 single cells tend to respond to one information type, (Chéreau et al., 2020; Estebanez  
349 et al., 2012; Rodgers et al., 2021). In this case, we hypothesize that different  
350 populations in BC encode current and history information, which leads to a larger  
351 fraction of neurons in BC that are active for the CR-Hit pair. A larger number of active  
352 neurons in BC may facilitate sensorimotor integration involving downstream areas  
353 such as the motor cortex, further resulting in gaining an expert level (Zuo and Diamond,  
354 2019).

355 It is probable that both history and learning involve other circuit elements such  
356 as deep cortical layers (Pasupathy and Miller, 2005; Roelfsema and Holtmaat, 2018;  
357 Vecchia et al., 2020), inhibitory subtypes, other pathways (Lacefield et al., 2019;  
358 Mohan et al., 2022; Musall et al., n.d.; Petreanu et al., 2012; Williams and Holtmaat,  
359 2019), and subcortical areas (Fu et al., n.d.; Garrett et al., 2020; Pasupathy and Miller,  
360 2005; Pfeffer et al., 2013). Future work may aim to dissect specific subpopulations that  
361 carry history information using similar behavioral tasks, e.g., imaging of cortex-wide  
362 layer 5 dynamics. Layer 5 neurons may be ideal in integrating past information arriving  
363 onto the apical dendrites in layer 1<sup>54</sup> with incoming information arriving from the  
364 thalamus. In addition, similar tasks with reward after CR trials, or tasks that better  
365 differentiate between choice and outcome (decision tasks, giving different  
366 probabilities of outcome to each choice), or tasks with a dynamic inter-trial interval  
367 may shed light on the meaning of this history-learning effect. In summary, our results

368 imply that as we learn, the cortex learns to better integrate past and present  
369 information resulting in expert performance.

370 **Acknowledgements:**

371 This project has received funding from the European Union's Horizon 2020 research  
372 and innovation program under the Marie Skłodowska-Curie grant agreement No  
373 659719 (A.G.). This work was supported by grants from Hebrew University of Jerusalem  
374 (Start-up grant; A.G.) and the Swiss National Science Foundation (SNSF) (31003A-  
375 149858 and 310030B\_170269; F.H.).

376 **declaration of interests:**

377 The authors declare no competing interests.

378 **Data and code availability:**

379 The data and code that support the findings of this study are available at  
380 <https://osf.io/hkvc5>.

381

382 **Author contributions:** A.G. and F.H. designed the experiments. A.G. conducted the  
383 experiments. A.G. and O.M. performed data analysis. A.G. and O.M. wrote the  
384 manuscript with comments from F.H.

385 **Star methods:**

386 **Animals and surgical procedures:**

387 Methods were carried out according to the guidelines of the Veterinary Office of  
388 Switzerland and following approval by the Cantonal Veterinary Office in Zurich. A total  
389 of 7 adult male mice (1-4 months old) were used in this study. These mice were triple  
390 transgenic Rasgrf2-2A-dCre; CamK2a-tTA;TITL-GCaMP6f animals, expressing GCaMP6f  
391 in excitatory neocortical layer 2/3 neurons (Gilad and Helmchen, 2020). The dataset  
392 used here is identical to our previous study (Gilad and Helmchen, 2020), but here we  
393 have applied a completely novel history analysis. To generate triple transgenic animals,  
394 double transgenic mice carrying CamK2a-Tta62 and TITL-GCaMP6f63 were crossed  
395 with a Rasgrf2-2A-dCre line (64; individual lines are available from The Jackson  
396 Laboratory as JAX# 016198, JAX#024103, and JAX# 22864, respectively). The Rasgrf2-  
397 2A-dCre;CamK2a-tTA;TITL-GCaMP6f line contains a tet-off system, by which transgene

398 expression can be suppressed upon doxycycline treatment ((Garner et al., 2012;  
399 Gossen and Bujard, 1992). However, doxycycline treatment is not necessary in these  
400 animals, since the Rasgrf2-2A-dCre line holds an inducible system of its own, given that  
401 the destabilized Cre (dCre) expressed under the control of the Rasgrf2-2A promoter  
402 needs to be stabilized by trimethoprim (TMP) to be fully functional. TMP (Sigma T7883)  
403 was reconstituted in Dimethyl sulfoxide (DMSO, Sigma 34869) at a saturation level of  
404 100 mg/ml, freshly prepared for each experiment. For TMP induction, mice were given  
405 a single intraperitoneal injection (150 µg TMP/g body weight; 29 g needle; 3–5 days  
406 post-surgery), diluted in 0.9% saline solution. We used an intact skull preparation (Silasi  
407 et al., 2016) for chronic wide-field calcium imaging of neocortical activity(Gilad et al.,  
408 2018b). Mice were anesthetized with 2% isoflurane (in pure O<sub>2</sub>) and body temperature  
409 was maintained at 37 °C. We applied local analgesia (lidocaine 1%), exposed and  
410 cleaned the skull, and removed some muscles to access the entire dorsal surface of the  
411 left hemisphere (Fig. 2a; ~6 × 8 mm<sup>2</sup> from ~3 mm anterior to bregma to ~1 mm  
412 posterior to lambda; from the midline to at least 5 mm laterally). We built a wall around  
413 the hemisphere with adhesive material (iBond; UV-cured) and dental cement “worms”  
414 (Charisma). Then, we applied transparent dental cement homogenously over the  
415 imaging field (Tetric EvoFlow T1). Finally, a metal post for head fixation was glued on  
416 the back of the right hemisphere. This minimally invasive preparation enabled high-  
417 quality chronic imaging with high success rate.

418

#### 419 **Texture discrimination task.**

420 Mice were trained on a go/no-go discrimination task (Fig. 1a) using a data acquisition  
421 interface (USB-6008; National Instruments) and custom-written LabVIEW software  
422 (National Instruments). Each trial started with an auditory cue (stimulus cue; 2 beeps  
423 at 2 kHz, 100-ms duration with 50-ms interval), signaling the approach of either two  
424 types of sandpapers (grit size P100: rough texture; P1200: smooth texture; 3M) to the  
425 mouse’s whiskers as ‘go’ or ‘no-go’ textures (Fig. 1a; pseudo-randomly presented with  
426 no more than three repetitions). Sandpapers were mounted onto panels attached to a  
427 stepper motor (T-NM17A04; Zaber) mounted onto a motorized linear stage (T-  
428 LSM100A; Zaber) to move textures in and out of reach of whiskers. The texture stayed  
429 in touch with the whiskers for 2 s, and then it was moved out after which an additional  
430 auditory cue (response cue; 4 beeps at 4 kHz, 50-ms duration with 25-ms interval)

431 signaled the start of a 2-s response period. The stimulus and response cues were  
432 identical in both textures. The interval between the trials was 6 s (8 s from response to  
433 next cue). A water reward (~3  $\mu$ L) was given to the mouse for licking for the go texture  
434 only after the response cue ('Hit'), i.e. for the first correct lick during the response  
435 period (Fig. 1a; lick were detected using a piezo sensor). Punishment with white noise  
436 was given for licking for the no-go texture ('false alarms'; FA). Licking before the  
437 response cue was neither rewarded nor punished. Reward and punishment were  
438 omitted when mice withheld licking for the no-go ('correct-rejections', CR) or go  
439 ('Misses') textures.

440 **Training and performance.** Five mice were trained to lick for the P100 texture (mice  
441 #1-4 and 6) and 2 mice were trained to lick for the P1200 texture (mice #5 and 7). Mice  
442 were first handled and accustomed to head fixation before starting water scheduling.  
443 Before imaging began mice were conditioned to lick for reward after the go texture  
444 (presented within a similar trial structure as the task itself). Imaging began only after  
445 mice reliably licked for the response cue (typically after the first day; 200–400 trials).  
446 On the first day of imaging, mice were presented with the 'go' texture and after 50  
447 trials the 'no-go' texture was gradually introduced (starting from 10% and increasing  
448 by 10% approximately every 50 trials (Guo et al., 2014) until reaching 50% probability  
449 for the no-go texture by the end of the day. 6 out of the 7 mice learned the task within  
450 3–4 days after around a thousand trials (Supplementary Fig. 1). Mouse #4 learned the  
451 task within 10 days. An effort was made to maintain a constant position of the texture  
452 and cameras across imaging days in order to maintain similar stimulation and imaging  
453 parameters.

454 **Wide-field calcium imaging.** We used a wide-field approach to image large parts of the  
455 dorsal cortex while mice learned to perform the task (Gilad et al., 2018b) .A sensitive  
456 CMOS camera (Hamamatsu Orca Flash 4.0) was mounted on top of a dual objective  
457 setup. Two objectives (Navitar; top objective: D-5095, 50 mm f0.95; bottom objective  
458 inverted: D-2595, 25 mm f0.95) were interfaced with a dichroic (510 nm; AHF;  
459 Beamsplitter T510LPXRT) filter cube (Thorlabs). This combination allowed a ~9-mm  
460 field-of-view, covering most of the dorsal cortex of the hemisphere contralateral to  
461 texture presentation. Blue LED light (Thorlabs; M470L3) was guided through an  
462 excitation filter (480/40 nm BrightLine HC), a diffuser, collimated, reflected from the  
463 dichroic mirror, and focused through the bottom objective ~100  $\mu$ m below the blood  
464 vessels. Green light emitted from the preparation passed through both objectives and

465 an emission filter (514/30 nm BrightLine HC) before reaching the camera. The total  
466 power of blue light on the preparation was <5mW; i.e., <0.1 mW/mm<sup>2</sup>. At this  
467 illumination power we did not observe any photobleaching. Data was collected with a  
468 temporal resolution of 20 Hz and a spatial sampling of 512 × 512 pixels, resulting in a  
469 spatial resolution of ~20 μm/pixel. On each imaging day a green reflectance image was  
470 taken as reference to enable registration across different imaging days using the blood  
471 vessel pattern (fiber-coupled LED illuminated from the side; Thorlabs).

472 **Mapping and area selection.** Each mouse underwent a mapping session under  
473 anesthesia (1% isoflurane), in which we presented five different sensory stimuli  
474 (contra-lateral side (Gilad and Helmchen, 2020)). Next, we registered each imaging day  
475 to the mapping day using skull coordinates from the green images. Finally, we  
476 registered each mouse onto a 2D top view mouse atlas using both functional patches  
477 from the mapping and skull coordinates ((Gilad and Helmchen, 2020); ©2004 Allen  
478 Institute for Brain Science. Allen Mouse Brain Atlas. Available from:  
479 <http://mouse.brain-map.org/29>). Within the atlas borders, we defined 25 areas of  
480 interest, with some manual modifications within these borders to fit the functional  
481 activity for each mouse. Motor cortex areas were defined based on stereotaxic  
482 coordinates and functional patches for each mouse (see below). Thus, all mice had  
483 similar regions of interest that were comparable within and across mice. We grouped  
484 these 25 areas into auditory (green), association (pink), somatosensory + V1 (blue), and  
485 motor (red) areas (Fig. 1d and Supplementary Fig. 1b). Auditory areas: Primary auditory  
486 (A1), Auditory dorsal (AD) and Temporal association area (TEA). Sensory areas:  
487 Somatosensory mouth (Mo), Somatosensory nose (No), Somatosensory hindlimb (HL),  
488 Somatosensory forelimb (FL), Barrel cortex (BC; Primary somatosensory whisker);  
489 Secondary somatosensory whisker (S2), Somatosensory trunk (Tr) and Primary visual  
490 cortex (V1). Motor areas: whisker-related primary motor cortex (M1; 1.5 anterior and  
491 1mm lateral from bregma, corresponding to the whisker evoked activation patch in M1  
492 from the mapping session), anterior lateral motor cortex (ALM; 2.5 anterior and 1.5  
493 mm lateral from bregma69) and secondary motor cortex (M2; 1.5 anterior and 0.5mm  
494 lateral from bregma corresponding11). Association cortex: Rostrolateral (RL), Anterior  
495 (A), Anterior lateral (AL), Anterior medial (AM), Posterior medial (PM), Lateral medial  
496 (LM), Lateral intermediate (LI), Posterior lateral (PL), Post-rhinal (PR), Retrosplenial  
497 dorsal (RD) and Retrosplenial angular (RA). We note that our definition of association



498 cortex is broad and may include or exclude areas that are not necessarily classical  
499 association areas.

500

501 **Whisker and body tracking.** In addition to wide-field imaging, we tracked movements  
502 of the whiskers and the body of the mouse during the task (Fig. 1a). The mouse was  
503 illuminated with a 940-nm infrared LED. Whiskers were imaged at 50 Hz (500 × 500  
504 pixels) using a high-speed CMOS camera (A504k; Basler), from which we calculated  
505 time course of whisking envelope and the time of first touch (see below). An additional  
506 camera monitored the movements of the mouse at 30 Hz (The imaging source; DMK  
507 22BUC03; 720 × 480 pixels). We used movements of both forelimbs and the head/neck  
508 region to assess body movements, to reliably detect large movements (Fig. 1a; see  
509 Data Analysis below).

510 **Calculating body movements.** We used a body camera to detect general movements  
511 of the mouse (30 Hz frame rate). For each imaging day, we first outlined the forelimbs  
512 and the neck areas (one area of interest for each), which were reliable areas to detect  
513 general movements. Next, we calculated the body movement (1 minus frame-to-frame  
514 correlation) within these areas as a function of time for each trial. We then averaged  
515 all the defined body areas to one "body" vector.

516 **Whisker tracking.** The average whisker angle across all imaged whiskers was  
517 measured using automated whisker tracking software (Knutsen et al., 2004). The mean  
518 whisker envelope was calculated as the difference between maximum and minimum  
519 whisker angles along a sliding window equal to the imaging frame duration (50 ms;  
520 Gilad et al., 2018b)). Whisker envelope was normalized just before the auditory cue  
521 similar to wide-field data (Frame zero). In addition, we manually detected the first  
522 frame, in which any whisker touched the upcoming texture, using the movies from the  
523 whisker camera (LabVIEW custom program). The first touch occurred on average 0.33  
524 and 0.34 s before the texture stopped for naïve and expert mice respectively. Time of  
525 first touch did not differ between expert and naïve mice ( $P > 0.05$ ; Mann–Whitney U-  
526 test;  $n = 7$  mice). We note that the first touch occurred mostly (but not exclusively) in  
527 the pre-period from  $-1$  to  $-0.5$  relative to texture stop.

528 **Data analysis.** Data analysis was performed using Matlab software (Mathworks). All  
529 mice were continuously imaged during learning (5–11 days). Wide-field fluorescence  
530 images were sampled down to 256 × 256 pixels and pixels outside the imaging area  
531 were discarded. This resulted in a spatial resolution of  $\sim 40 \mu\text{m}/\text{pixel}$  and was sufficient



532 to determine cortical borders, despite further scattering of emitted light through the  
533 tissue and skull. Each pixel and each trial were normalized to baseline several frames  
534 before the stimulus cue (frame 0 division). Our main focus was on the history effect.  
535 Because the hit trials had the largest portion from all trials, we focused on the hit trials.  
536 We sub grouped all the Hit trials based on the type of the preceding trial as follow: CR-  
537 Hit - Hit trials that were preceded by correct rejection trial. Hit-Hit - Hit trials that were  
538 preceded by a Hit trial. FA-Hit - hit trials that were preceded by a false alarm trial. We  
539 mainly focused on comparing Hit-Hit and CR-Hit pairs since they had a large proportion  
540 in naïve, learning and expert phases (but see Figure s4). We defined two time periods  
541 within the trial structure: pre (-1 to 0.6 s relative to texture stop) and stim (-0.2 to 0.2  
542 relative to texture stop; Fig. 1a).

543  
544 **Calculation of learning curves.** Trials were binned (n = 100 trials with no overlap)  
545 across learning (at the stimulus time, adjusted for each mouse) and the performance  
546 (defined as  $d' = Z(\text{Hit}/(\text{Hit} + \text{Miss})) - Z(\text{FA}/(\text{FA} + \text{CR}))$  where Z denotes the inverse of the  
547 cumulative distribution function) was calculated for each bin. Next, each behavioral  
548 learning curve was fitted with a sigmoid function  $s(t) = a \frac{1}{1 + e^{-\frac{(t-b)}{c}}}$  Where  $a$  denotes  
549 the amplitude,  $b$  the time point (in trial numbers) of the inflection point, and  $c$  the  
550 steepness of the sigmoid.

551 A learning threshold was defined as the bin in which the  $d'$  crossed the inflection point  
552 (half point) of the learning curve sigmoid fit. (Fig. s1).

553 **Defining the learning phases:** We defined the naïve, learning and expert phase each  
554 as one day of recordings, the naïve day was defined as the first day to have enough  
555 correct rejections that the performance is still before the crossing threshold (typically  
556 the 2nd recording day). The learning day was defined as the day that the mouse  
557 crossed the learning threshold, and the expert was defined as the last day of the mouse  
558 (usually the 5th day)

559

560 **Calculating history modulation and onset:** We defined the 'history modulation' as the  
561 difference between the average activation of all CR-Hit and Hit-Hit trials. To calculate  
562 significance of history modulation, we calculated the sample distribution by trial  
563 shuffling between CR-Hit and Hit-Hit trials (n=1000 iterations). We than defined the  
564 onset of the history modulation as the first bin exceeding mean  $\pm 2$  SD of the sample

565 distribution. We calculated this history modulation and significance across the trial  
566 dimension (every frame) and across learning dimension (every 100 trials). In the  
567 learning dimension, we calculated the average activity in the stim period (-0.2:0.2) of  
568 all the CR-Hit and Hit-Hit trials that were falling within each 100 trials bin.

569 **Discrimination power between hit trials sub grouped by history.** To measure how well  
570 could neuronal populations discriminate between go and no-go textures, we calculated  
571 a receiver operating characteristics (ROC) curve and calculated its area under the curve  
572 (AUC; with a value of 0.5 indicating no discrimination power). This can be done for a  
573 given area, each time frame within each learning phase separately (Fig. 6).

574

575 **Statistical analysis.** In general, the Wilcoxon signed-rank test to compare a  
576 population's median to zero (or between two paired populations). Multiple group  
577 correction was used when comparing between more than two groups.

578

- 579           **References:**
- 580
- 581           Akrami A, Kopec CD, Diamond ME, Brody CD. 2018. Posterior parietal cortex  
582           represents sensory history and mediates its effects on behaviour. *Nature*  
583           **554**:368–372. doi:10.1038/nature25510
- 584           Banerjee A, Parente G, Teutsch J, Lewis C, Voigt FF, Helmchen F. 2020. Value-guided  
585           remapping of sensory cortex by lateral orbitofrontal cortex. *Nature* **585**:245–  
586           250. doi:10.1038/S41586-020-2704-Z
- 587           Blake DT, Strata F, Churchland AK, Merzenich MM. 2002. Neural correlates of  
588           instrumental learning in primary auditory cortex. *Proc Natl Acad Sci U S A*  
589           **99**:10114–10119. doi:10.1073/pnas.092278099
- 590           Chen JL, Carta S, Soldado-Magraner J, Schneider BL, Helmchen F. 2013. Behaviour-  
591           dependent recruitment of long-range projection neurons in somatosensory  
592           cortex. *Nature* **499**:336–340. doi:10.1038/nature12236
- 593           Chen JL, Margolis DJ, Stankov A, Sumanovski LT, Schneider BL, Helmchen F. 2015.  
594           Pathway-specific reorganization of projection neurons in somatosensory cortex  
595           during learning. *Nat Neurosci* **18**:1101–1108. doi:10.1038/nn.4046
- 596           Chéreau R, Bawa T, Fodouliau L, Carleton A, Pagès S, Holtmaat A. 2020. Dynamic  
597           perceptual feature selectivity in primary somatosensory cortex upon reversal  
598           learning. *Nat Commun* **11**. doi:10.1038/s41467-020-17005-x
- 599           Driscoll LN, Pettit NL, Minderer M, Chettih SN, Harvey CD. 2017a. Dynamic  
600           Reorganization of Neuronal Activity Patterns in Parietal Cortex. *Cell* **170**:986–  
601           999.e16. doi:10.1016/j.cell.2017.07.021
- 602           Driscoll LN, Pettit NL, Minderer M, Chettih SN, Harvey CD, Driscoll LN, Pettit NL,  
603           Minderer M, Chettih SN, Harvey CD. 2017b. Dynamic Reorganization of  
604           Neuronal Activity Patterns in Parietal Cortex Article Dynamic Reorganization of  
605           Neuronal Activity Patterns in Parietal Cortex. *Cell* **170**:1–14.  
606           doi:10.1016/j.cell.2017.07.021
- 607           Estebanez L, Boustani S el, Destexhe A, Shulz DE. 2012. Correlated input reveals  
608           coexisting coding schemes in a sensory cortex. *Nat Neurosci* **15**:1691–1699.  
609           doi:10.1038/nn.3258
- 610           Fu Y, Kaneko M, Tang Y, Alvarez-Buylla A, Stryker MP. n.d. A cortical disinhibitory  
611           circuit for enhancing adult plasticity. doi:10.7554/eLife.05558.001
- 612           Gallero-Salas Y, Han S, Sych Y, Voigt FF, Laurency B, Gilad A, Helmchen F. 2021.  
613           Sensory and Behavioral Components of Neocortical Signal Flow in  
614           Discrimination Tasks with Short-Term Memory. *Neuron* **109**:135–148.e6.  
615           doi:10.1016/J.NEURON.2020.10.017
- 616           Garion L, Dubin U, Rubin Y, Khateb M, Schiller Y, Azouz R, Schiller J. 2014. Texture  
617           coarseness responsive neurons and their mapping in layer 2-3 of the rat barrel  
618           cortex in vivo. *Elife* **3**:e03405. doi:10.7554/ELIFE.03405

- 619 Garner AR, Rowland DC, Hwang SY, Baumgaertel K, Roth BL, Kentros C, Mayford M.  
620 2012. Generation of a Synthetic Memory Trace. *Science (1979)* **335**:1513–1516.  
621 doi:10.1126/science.1214985
- 622 Garrett M, Manavi S, Roll K, Ollerenshaw DR, Groblewski PA, Ponvert ND, Kiggins JT,  
623 Casal L, Mace K, Williford A, Leon A, Jia X, Ledochowitsch P, Buice MA,  
624 Wakeman W, Mihalas S, Olsen SR. 2020. Experience shapes activity dynamics  
625 and stimulus coding of VIP inhibitory cells. *Elife* **9**. doi:10.7554/eLife.50340
- 626 Gilad A, Gallero-Salas Y, Groos D, Helmchen F. 2018a. Behavioral Strategy Determines  
627 Frontal or Posterior Location of Short-Term Memory in Neocortex. *Neuron*  
628 **99**:814–828.e7. doi:10.1016/j.neuron.2018.07.029
- 629 Gilad A, Gallero-salas Y, Groos D, Helmchen F, Gilad A, Gallero-salas Y, Groos D,  
630 Helmchen F. 2018b. Behavioral Strategy Determines Frontal or Posterior  
631 Location of Short-Term Memory in Neocortex. *Neuron* **99**:814–828.e7.  
632 doi:10.1016/j.neuron.2018.07.029
- 633 Gilad A, Helmchen F. 2020. Spatiotemporal refinement of signal flow through  
634 association cortex during learning. *Nat Commun* **11**:1–14. doi:10.1038/s41467-  
635 020-15534-z
- 636 Gilad A, Maor I, Mizrahi A. 2020. Learning-related population dynamics in the  
637 auditory thalamus. *Elife* **9**:1–18. doi:10.7554/eLife.56307
- 638 Gilad A, Meirovithz E, Slovin H. 2013. Population Responses to Contour Integration:  
639 Early Encoding of Discrete Elements and Late Perceptual Grouping. *Neuron*  
640 **78**:389–402. doi:10.1016/j.neuron.2013.02.013
- 641 Gossen M, Bujard H. 1992. Tight control of gene expression in mammalian cells by  
642 tetracycline-responsive promoters. *Proc Natl Acad Sci U S A* **89**:5547–5551.  
643 doi:10.1073/pnas.89.12.5547
- 644 Guo Z, Li N, Huber D, Ophir E, Gutnisky D, Ting J, Feng G, Svoboda K. 2014. Flow of  
645 cortical activity underlying a tactile decision in mice. *Neuron* **81**:179–194.  
646 doi:10.1016/j.neuron.2013.10.020
- 647 Harvey CD, Coen P, Tank DW. 2012. Choice-specific sequences in parietal cortex  
648 during a virtual-navigation decision task. *Nature* **484**:62–68.  
649 doi:10.1038/nature10918
- 650 Hattori R, Danskin B, Babic Z, Mlynaryk N, Komiyama T. 2019. Area-Specificity and  
651 Plasticity of History-Dependent Value Coding During Learning. *Cell* **177**:1858–  
652 1872.e15. doi:10.1016/j.cell.2019.04.027
- 653 Hovde K, Gianatti M, Witter MP, Whitlock JR. 2018. Architecture and organization of  
654 mouse posterior parietal cortex relative to extrastriate areas. *European Journal*  
655 *of Neuroscience* **49**:1313–1329. doi:10.1111/ejn.14280
- 656 Hwang EJ, Dahlen JE, Mukundan M, Komiyama T. 2017. History-based action  
657 selection bias in posterior parietal cortex. *Nat Commun* **8**:1–14.  
658 doi:10.1038/s41467-017-01356-z

- 659 Johnson CM, Peckler H, Tai LH, Wilbrecht L. 2016. Rule learning enhances structural  
660 plasticity of long-range axons in frontal cortex. *Nature Communications* 2016  
661 7:1 7:1–14. doi:10.1038/ncomms10785
- 662 Jurjut O, Georgieva P, Busse L, Katzner S. 2017. Learning Enhances Sensory Processing  
663 in Mouse V1 before Improving Behavior. *J Neurosci* 37:6460–6474.  
664 doi:10.1523/JNEUROSCI.3485-16.2017
- 665 Kawai T, Yamada H, Sato N, Takada M, Matsumoto M. 2015. Roles of the Lateral  
666 Habenula and Anterior Cingulate Cortex in Negative Outcome Monitoring and  
667 Behavioral Adjustment in Nonhuman Primates. *Neuron* 88:792–804.  
668 doi:10.1016/J.NEURON.2015.09.030
- 669 Khodagholy D, Gelineas JN, Buzsáki G. 2017. Learning-enhanced coupling between  
670 ripple oscillations in association cortices and hippocampus. *Science* 358:369–  
671 372. doi:10.1126/science.aan6203
- 672 Khodagholy D, Gelineas JN, Buzsáki G. n.d. Learning-enhanced coupling between ripple  
673 oscillations in association cortices and hippocampus.
- 674 Knutsen PM, Derdikman D, Ahissar E. 2004. Tracking Whisker and Head Movements  
675 in Unrestrained Behaving Rodents. *J Neurophysiol* 93:2294–2301.  
676 doi:10.1152/jn.00718.2004
- 677 Komiyama T, Sato TR, O’Connor DH, Zhang Y-X, Huber D, Hooks BM, Gabitto M,  
678 Svoboda K. 2010. Learning-related fine-scale specificity imaged in motor cortex  
679 circuits of behaving mice. *Nature* 464:1182–1186. doi:10.1038/nature08897
- 680 Lacefield CO, Pnevmatikakis EA, Paninski L, Bruno RM. 2019. Reinforcement Learning  
681 Recruits Somata and Apical Dendrites across Layers of Primary Sensory Cortex.  
682 *Cell Rep* 26:2000-2008.e2. doi:10.1016/j.celrep.2019.01.093
- 683 le Merre P, Esmaeili V, Charrière E, Galan K, Salin PA, Petersen CCH, Crochet S. 2018.  
684 Reward-Based Learning Drives Rapid Sensory Signals in Medial Prefrontal Cortex  
685 and Dorsal Hippocampus Necessary for Goal-Directed Behavior. *Neuron* 97:83–  
686 91.e5. doi:10.1016/j.neuron.2017.11.031
- 687 Li W, Piëch V, Gilbert CD. 2008. Learning to link visual contours. *Neuron* 57:442–451.  
688 doi:10.1016/j.neuron.2007.12.011
- 689 Lyamzin D, Benucci A. 2019. The mouse posterior parietal cortex: Anatomy and  
690 functions. *Neurosci Res* 140:14–22. doi:10.1016/j.neures.2018.10.008
- 691 Marcos AS, Harvey CD. 2016. History-dependent variability in population dynamics  
692 during evidence accumulation in cortex. *Nat Neurosci* 19:1672–1680.  
693 doi:10.1038/nn.4403
- 694 Mohan H, An X, Kondo H, Zhao S, Matho KS, Musall S, Mitra P, Huang ZJ. 2022.  
695 Cortical glutamatergic projection neuron types contribute to distinct functional  
696 subnetworks. *bioRxiv* 2021.12.30.474537. doi:10.1101/2021.12.30.474537
- 697 Morcos AS, Harvey CD. 2016. History-dependent variability in population dynamics  
698 during evidence accumulation in cortex 19. doi:10.1038/nn.4403

- 699 Musall S, Sun XR, Mohan H, An X, Gluf S, Drewes R, Osten P, Churchland AK. n.d.  
700 Pyramidal cell types drive functionally distinct cortical activity patterns during  
701 decision-making. doi:10.1101/2021.09.27.461599
- 702 Oh SW, Harris JA, Ng L, Winslow B, Cain N, Mihalas S, Wang Q, Lau C, Kuan L, Henry  
703 AM, Mortrud MT, Ouellette B, Nguyen TN, Sorensen SA, Slaughterbeck CR,  
704 Wakeman W, Li Y, Feng D, Ho A, Nicholas E, Hirokawa KE, Bohn P, Joines KM,  
705 Peng H, Hawrylycz MJ, Phillips JW, Hohmann JG, Wohnoutka P, Gerfen CR, Koch  
706 C, Bernard A, Dang C, Jones AR, Zeng H. 2014. A mesoscale connectome of the  
707 mouse brain. *Nature* **508**:207–214. doi:10.1038/nature13186
- 708 Pasupathy A, Miller EK. 2005. Different time courses of learning-related activity in the  
709 prefrontal cortex and striatum **1138**:873–876.
- 710 Petreanu L, Gutnisky DA, Huber D, Xu NL, Oconnor DH, Tian L, Looger L, Svoboda K.  
711 2012. Activity in motor–sensory projections reveals distributed coding in  
712 somatosensation. *Nature* **2012 489**:7415 **489**:299–303.  
713 doi:10.1038/nature11321
- 714 Pfeffer CK, Xue M, He M, Huang ZJ, Scanziani M. 2013. Inhibition of inhibition in visual  
715 cortex: The logic of connections between molecularly distinct interneurons. *Nat*  
716 *Neurosci* **16**:1068–1076. doi:10.1038/nn.3446
- 717 Pho GN, Goard MJ, Woodson J, Crawford B, Sur M. 2018. Task-dependent  
718 representations of stimulus and choice in mouse parietal cortex. *Nat Commun* **9**.  
719 doi:10.1038/s41467-018-05012-y
- 720 Poort J, Khan AG, Pachitariu M, Nemri A, Orsolich I, Krupic J, Bauza M, Sahani M, Keller  
721 GB, Mrsic-Flogel TD, Hofer SB. 2015. Learning Enhances Sensory and Multiple  
722 Non-sensory Representations in Primary Visual Cortex. *Neuron* **86**:1478–1490.  
723 doi:10.1016/j.neuron.2015.05.037
- 724 Rodgers CC, Nogueira R, Pil BC, Greeman EA, Park JM, Hong YK, Fusi S, Bruno RM.  
725 2021. Sensorimotor strategies and neuronal representations for shape  
726 discrimination. *Neuron* **109**:2308-2325.e10. doi:10.1016/j.neuron.2021.05.019
- 727 Roelfsema PR, Holtmaat A. 2018. Control of synaptic plasticity in deep cortical  
728 networks. *Nat Rev Neurosci*. doi:10.1038/nrn.2018.6
- 729 Safaai H, von Heimendahl M, Sorando JM, Diamond ME, Maravall M. 2013.  
730 Coordinated Population Activity Underlying Texture Discrimination in Rat Barrel  
731 Cortex. *Journal of Neuroscience* **33**:5843–5855. doi:10.1523/JNEUROSCI.3486-  
732 12.2013
- 733 Save E, Poucet B. 2009. Role of the parietal cortex in long-term representation of  
734 spatial information in the rat. *Neurobiol Learn Mem* **91**:172–178.  
735 doi:10.1016/j.nlm.2008.08.005
- 736 Scott Benjamin B, Constantinople CM, Akrami A, Hanks TD, Brody CD, Tank DW. 2017.  
737 Fronto-parietal Cortical Circuits Encode Accumulated Evidence with a Diversity  
738 of Timescales. *Neuron* **95**:385–398.e5. doi:10.1016/j.neuron.2017.06.013

- 739 Scott Benjamin B., Constantinople CM, Akrami A, Hanks TD, Brody CD, Tank DW.  
740 2017. Fronto-parietal Cortical Circuits Encode Accumulated Evidence with a  
741 Diversity of Timescales. *Neuron* **95**:385-398.e5.  
742 doi:10.1016/J.NEURON.2017.06.013
- 743 Silasi G, Xiao D, Vanni MP, Chen ACN, Murphy TH. 2016. Intact skull chronic windows  
744 for mesoscopic wide-field imaging in awake mice. *J Neurosci Methods* **267**:141–  
745 149. doi:10.1016/j.jneumeth.2016.04.012
- 746 Sul JH, Kim H, Huh N, Lee D, Jung MW. 2010. Distinct Roles of Rodent Orbitofrontal  
747 and Medial Prefrontal Cortex in Decision Making. *Neuron* **66**:449–460.  
748 doi:10.1016/J.NEURON.2010.03.033
- 749 Suzuki A, Kosugi S, Murayama E, Sasakawa E, Ohkawa N, Konno A, Hirai H, Inokuchi K.  
750 2022. A cortical cell ensemble in the posterior parietal cortex controls past  
751 experience-dependent memory updating. *Nat Commun* **13**.  
752 doi:10.1038/s41467-021-27763-x
- 753 Tsutsui KI, Grabenhorst F, Kobayashi S, Schultz W. 2016. A dynamic code for  
754 economic object valuation in prefrontal cortex neurons. *Nature*  
755 *Communications* 2016 7:1 7:1–16. doi:10.1038/ncomms12554
- 756 Vann SD, Aggleton JP, Maguire EA. 2009. What does the retrosplenial cortex do? *Nat*  
757 *Rev Neurosci* **10**:792–802. doi:10.1038/nrn2733
- 758 Vanni MP, Murphy TH. 2014. Mesoscale Transcranial Spontaneous Activity Mapping  
759 in GCaMP3 Transgenic Mice Reveals Extensive Reciprocal Connections between  
760 Areas of Somatomotor Cortex. *Journal of Neuroscience* **34**:15931–15946.  
761 doi:10.1523/JNEUROSCI.1818-14.2014
- 762 Vecchia D, Beltramo R, Vallone F, Chéreau R, Forli A, Molano-Mazón M, Bawa T,  
763 Binini N, Moretti C, Holtmaat A, Panzeri S, Fellin T. 2020. Temporal Sharpening  
764 of Sensory Responses by Layer V in the Mouse Primary Somatosensory Cortex.  
765 *Current Biology* **30**:1589-1599.e10. doi:10.1016/j.cub.2020.02.004
- 766 Whitlock JR, Sutherland RJ, Witter MP, Moser M-B, Moser EI. 2008. Navigating from  
767 hippocampus to parietal cortex.
- 768 Wiest MC, Thomson E, Pantoja J, Nicolelis MAL. 2010. Changes in S1 Neural  
769 Responses During Tactile Discrimination Learning. *J Neurophysiol* **104**:300–312.  
770 doi:10.1152/jn.00194.2010
- 771 Williams LE, Holtmaat A. 2019. Higher-Order Thalamocortical Inputs Gate Synaptic  
772 Long-Term Potentiation via Disinhibition. *Neuron* **101**:91–102.e4.  
773 doi:10.1016/j.neuron.2018.10.049
- 774 Xu J, Harvey N, Saito T, Fukai A, Mabuchi A, Ikeda T, Yano F, Ohba S, Nishida N, Akune  
775 T, Yoshimura N, Nakagawa T, Nakamura K, Tokunaga K, Chung U-I, Kawaguchi H,  
776 Makino H, Komiyama T. 2014. Learning enhances the relative impact of top-  
777 down processing in the visual cortex. *Cognition* **2015**:173–180.  
778 doi:10.1038/nn.4061



779 Yan Y, Rasch MJ, Chen M, Xiang X, Huang M, Wu S, Li W. 2014. Perceptual training  
780 continuously refines neuronal population codes in primary visual cortex. *Nat*  
781 *Neurosci* **17**:1380–1387. doi:10.1038/nn.3805

782 Zuo Y, Diamond ME. 2019. Texture Identification by Bounded Integration of Sensory  
783 Cortical Signals. *Current Biology* **29**:1425-1435.e5.  
784 doi:10.1016/j.cub.2019.03.017

785

786



787 **Supplemental information:**

788

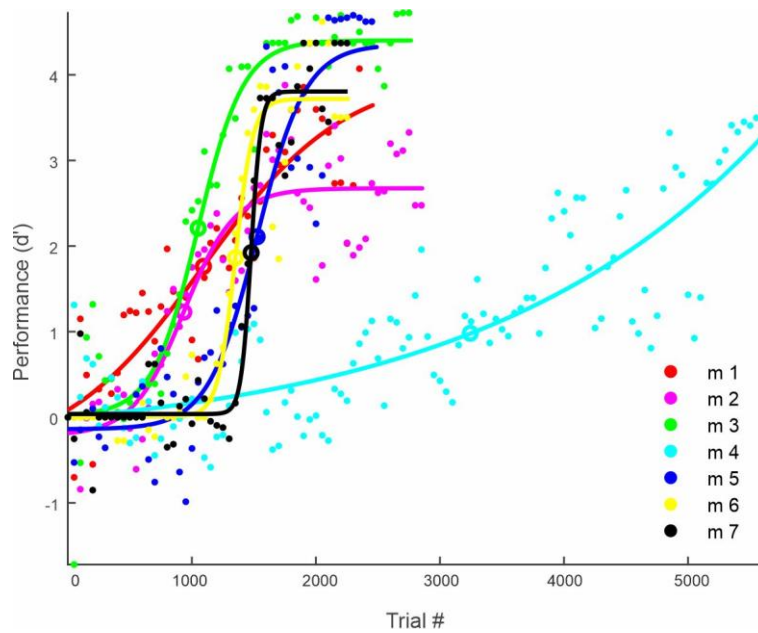

789

790 **Figure s1. Learning curves of all 7 mice.**

791 Performance ( $d'$ ) for all mice across the entire learning period is calculated for every  
 792 50 trails, fitted with a sigmoid function. The inflection point of the sigmoid fit is  
 793 defined as the learning threshold and indicated by open circle for each mouse.

794

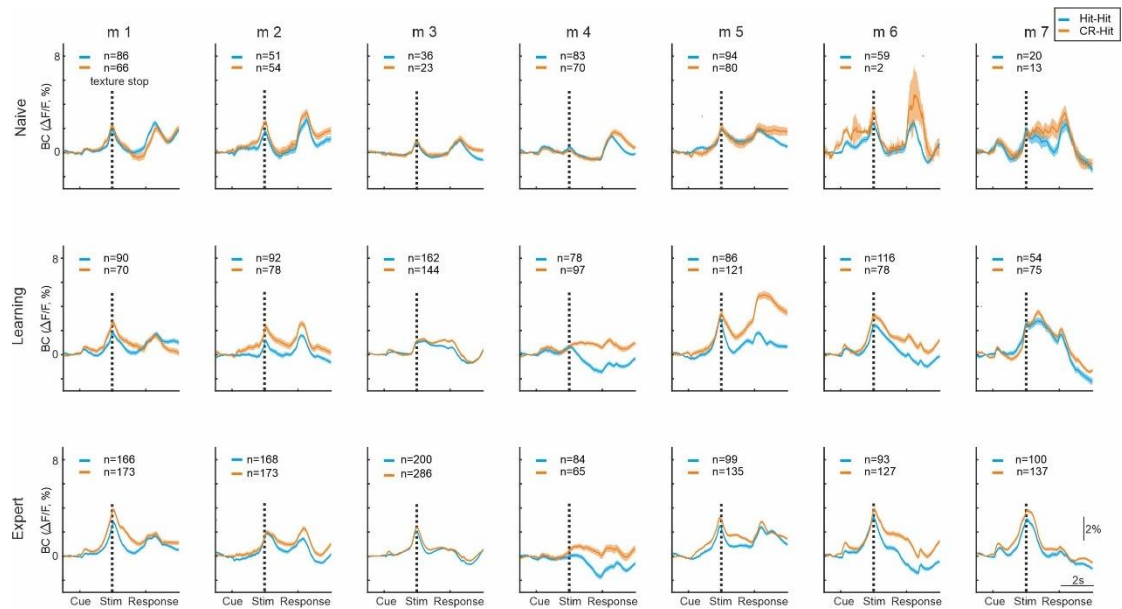

795

796 **Figure s2. Time course of each mouse in the naïve, learning and expert phase for hit**  
 797 **trials classified by preceding trial.**

798 Vertical dashed line denote texture stop. Shadows are mean  $\pm$  SEM across trials

799

800

801

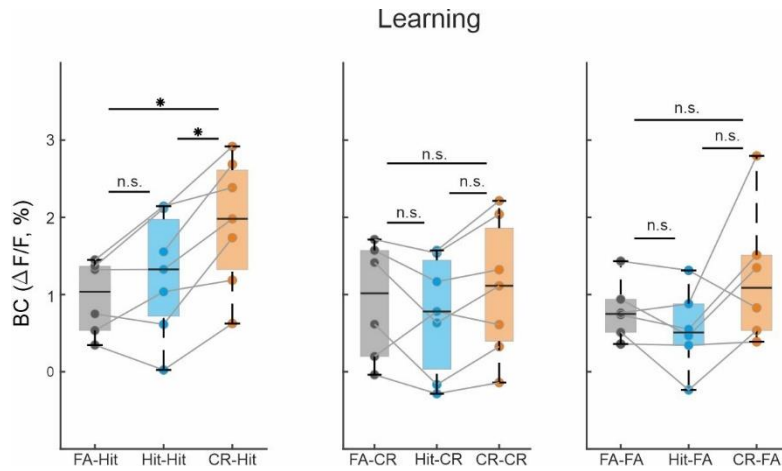

802

803

**Figure s3. Correct rejection trials have the strongest history effect.**

804

805

806

Grand average of BC activity of all history combinations in the learning phase during the stim period (-0.2–0.6ms). Boxes indicate quartiles at 25/75<sup>th</sup> percentile across mice (n=7). \*p < 0.05; n.s. not significant; Wilcoxon signed-rank test.

807

808

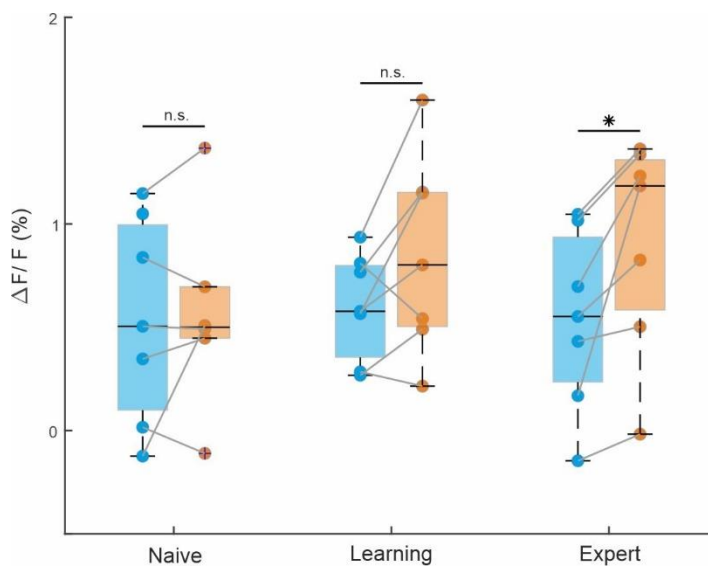

809

810

**Figure s4. RL activity at pre-stim period (-1– -0.6) across learning.**

811

812

Boxes indicate quartiles at 25/75<sup>th</sup> percentile across mice (n=7). \*p < 0.05; n.s. not significant; Wilcoxon signed-rank test.

813

814

815
